# Supplementary material for: Stakeholders’ Perspectives Regarding Supply Chain System of Pharmaceuticals and Vaccines in Pakistan: A Qualitative Study
Source: MDPI journal article supplement (doi:10.3390/healthcare10091738), 2022-09-10
Supplement: s1 [file s1]

**Supplementary Table S1. Demographic Characteristics of the Participants**

| Code                 | Gender | Qualification             | Work Experience | Current Designation        | Department                            | Number of Personnel |
|----------------------|--------|---------------------------|-----------------|----------------------------|---------------------------------------|---------------------|
| <b>Regulators</b>    |        |                           |                 |                            |                                       |                     |
| Regt 01              | Male   | B. Pharmacy & M.Phil.     | 16 years        | Drug Inspector             | District Health Office                | 4 persons           |
| Regt 02              | Male   | B. Pharmacy & M.Phil.     | 15 years        | Drug Controller            | District Health Office                | 5-6 persons         |
| Regt 03              | Male   | B. Pharmacy & M.Phil.     | 13 years        | Deputy Drug Controller     | District Health Office                | 5-6 persons         |
| Regt 04              | Male   | Pharm-D & M.Phil.         | 04 years        | Assistant Director         | Drug Regulatory Authority of Pakistan | 7-8 persons         |
| Regt 05              | Male   | Pharm-D                   | 03 years        | Assistant Director         | Drug Regulatory Authority of Pakistan | 7-8 persons         |
| Regt 06              | Male   | B. Pharmacy & M.Phil.     | 33 year         | Head of Vaccine Production | National Institute of Health          | 3-4 persons         |
| <b>Manufacturers</b> |        |                           |                 |                            |                                       |                     |
| Mfr 01               | Male   | B. Pharmacy, M.Phil.      | 13 years        | Production manager         | Production                            | 06 person           |
| Mfr 02               | Male   | B. Pharmacy               | 15 years        | Import and export manager  | Import and export                     | 05 person           |
| Mfr 03               | Male   | B. Pharmacy, PHD          | 14 years        | QC in charge               | Quality Control                       | 07 person           |
| Mfr 04               | Male   | B. Pharmacy               | 17 years        | GM production              | Production                            | 08 person           |
| Mfr 05               | Male   | B. Pharmacy, M.Phil.      | 17 years        | GM institutions            | Regulatory                            | 07 person           |
| Mfr 06               | Male   | Pharm D                   | 07 years        | QC officer                 | Quality Assurance                     | 06 person           |
| Mfr 07               | Male   | B. Pharmacy, PHD          | 18 years        | GM import and export       | Import and Export                     | 05 person           |
| Mfr 08               | Male   | B. Pharmacy, M.Phil.      | 15 years        | Head of QC                 | Quality Control                       | 05 person           |
| Mfr 09               | Male   | B. Pharmacy               | 14 years        | Production manger          | Production                            | 06 person           |
| <b>Distributors</b>  |        |                           |                 |                            |                                       |                     |
| Dist 01              | Male   | MBA                       | 18 years        | CEO                        | Supply chain                          | 5                   |
| Dist 02              | Male   | Masters                   | 16 years        | Managing director          | Supply chain                          | 7                   |
| Dist 03              | Male   | MBA, MS, LLB              | 13 years        | Institutional manager      | Institutional department              | 13                  |
| Dist 04              | Male   | B. Pharmacy, M.Phil., PHD | 16 years        | General manager            | Institutional department              | 6                   |
| Dist 05              | Male   | PharmD                    | 9 years         | Managing director          | Retail department                     | 7                   |
| Dist 06              | Male   | MBA                       | 15 years        | CEO                        | Institutional department              | 7                   |
| Dist 07              | Male   | Masters                   | 12 years        | Institutional manager      | Retail department                     | 9                   |
| Dist 08              | Male   | PharmD, M.Phil.           | 11 years        | Institutional manager      | Supply chain                          | 15                  |
| Dist 09              | Male   | BSC                       | 17 years        | Marketing manager          | Institutional department              | 6                   |
| Dist 10              | Female | BSc                       | 08 years        | Supply chain manager       | Retail department                     | 6                   |
| Dist 11              | Male   | BSc                       | 27 years        | CEO                        | Institutional department              | 7                   |
| Dist 12              | Male   | PharmD, M.Phil.           | 07 years        | General manager            | Supply chain                          | 7                   |

|                           |        |                          |          |                            |                        |    |
|---------------------------|--------|--------------------------|----------|----------------------------|------------------------|----|
| Dist 13                   | Male   | Masters                  | 15 years | Marketing manager          | Supply chain           | 9  |
| <b>Hospital Pharmacy</b>  |        |                          |          |                            |                        |    |
| Hosp 01                   | Female | Masters                  | 10 years | Procurement officer        | Procurement department | 06 |
| Hosp 02                   | Female | PharmD                   | 5 years  | Hospital Pharmacist        | Store Department       | 08 |
| Hosp 03                   | Male   | PharmD.                  | 08 years | Hospital Pharmacist        | Pharmacy               | 05 |
| Hosp 04                   | Male   | PharmD, M.Phil.          | 09 years | Hospital Pharmacist        | Store department       | 07 |
| Hosp 05                   | Male   | PharmD.                  | 06 years | Hospital Pharmacist        | Pharmacy               | 07 |
| Hosp 06                   | Male   | PharmD, M.Phil.          | 02 years | Procurement Officer        | Procurement department | 04 |
| Hosp 07                   | Female | B. Pharmacy, M.Phil. PHD | 14 years | Senior Hospital Pharmacist | Pharmacy               | 10 |
| Hosp 08                   | Male   | PharmD, M.P.H            | 11 years | Procurement Manager        | Pharmacy               | 15 |
| Hosp 09                   | Male   | PharmD                   | 04 Years | Hospital Pharmacist        | Pharmacy               | 07 |
| Hosp 10                   | Male   | PharmD                   | 07 years | Hospital Pharmacist        | Pharmacy               | 11 |
| Hosp 11                   | Male   | PharmD, M.Phil.          | 11 years | Hospital Pharmacist        | Pharmacy               | 07 |
| Hosp 12                   | Female | PharmD                   | 09 years | Senior Pharmacist          | Pharmacy               | 10 |
| Hosp 13                   | Male   | PharmD, M.Phil.          | 05 years | Hospital pharmacist        | Pharmacy               | 09 |
| <b>Community Pharmacy</b> |        |                          |          |                            |                        |    |
| Pharm 01                  | Female | PharmD                   | 04 years | Pharmacist                 | Pharmacy               | 08 |
| Pharm 02                  | Male   | PharmD                   | 07 years | Senior pharmacist          | Pharmacy               | 07 |
| Pharm 03                  | Male   | Pharm D                  | 03 years | Pharmacist                 | Pharmacy               | 07 |
| Pharm 04                  | Male   | Pharm D M.Phil.          | 06 years | Manager pharmacy           | Pharmacy               | 05 |
| Pharm 05                  | Male   | Pharm D                  | 05 years | CEO pharmacy               | Pharmacy               | 04 |
| Pharm 06                  | Male   | Pharm D                  | 03 years | In charge pharmacy         | Pharmacy               | 06 |
| Pharm 07                  | Male   | Pharm D M.Phil.          | 02 years | Pharmacist                 | Pharmacy               | 05 |
| Pharm 08                  | Male   | Pharm D                  | 05 years | Senior pharmacist          | Pharmacy               | 05 |
| Pharm 09                  | Male   | Pharm D M.Phil.          | 04 years | Manager Pharmacy           | Pharmacy               | 05 |
| Pharm 10                  | Male   | Pharm D                  | 02 years | Pharmacist                 | Pharmacy               | 04 |
| Pharm 11                  | Male   | Pharm D                  | 06 years | In charge Pharmacy         | Pharmacy               | 04 |
| Pharm 12                  | Male   | Pharm D                  | 04 years | Pharmacist                 | Pharmacy               | 06 |
| Pharm 13                  | Male   | Pharm D                  | 05 years | Pharmacist                 | Pharmacy               | 05 |
| Pharm 14                  | Male   | Pharm D                  | 04 years | Pharmacist                 | Pharmacy               | 05 |
| Pharm 15                  | Male   | B. Pharmacy PHD          | 15 years | CEO pharmacy               | Pharmacy               | 06 |

Regt: Regulator, Mfr: Manufacturers, Dist: Distributor, HP: Hospital pharmacist, CP: Community pharmacist
